# Supplementary material for: Catalyst- and solvent-freeipso-hydroxylation of arylboronic acids to phenols
Source: Royal Society of Chemistry journal article supplement (doi:10.1039/c9ra07201b), 2019-01-01
Supplement: c9ra07201b1.pdf [file c9ra07201b1.pdf]

Supporting information for

## Catalyst and solvent-free for ipso-hydroxylation of aryl boronic acids to phenols

### 1. Scheme and Figure

#### Scheme S1

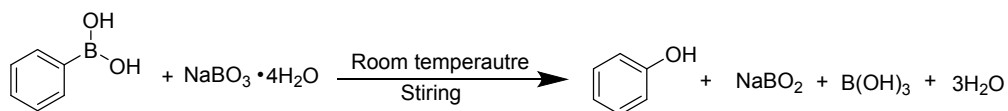

#### Figure S1

#### $\text{H}_2\text{O}_2$ oxidative pathway

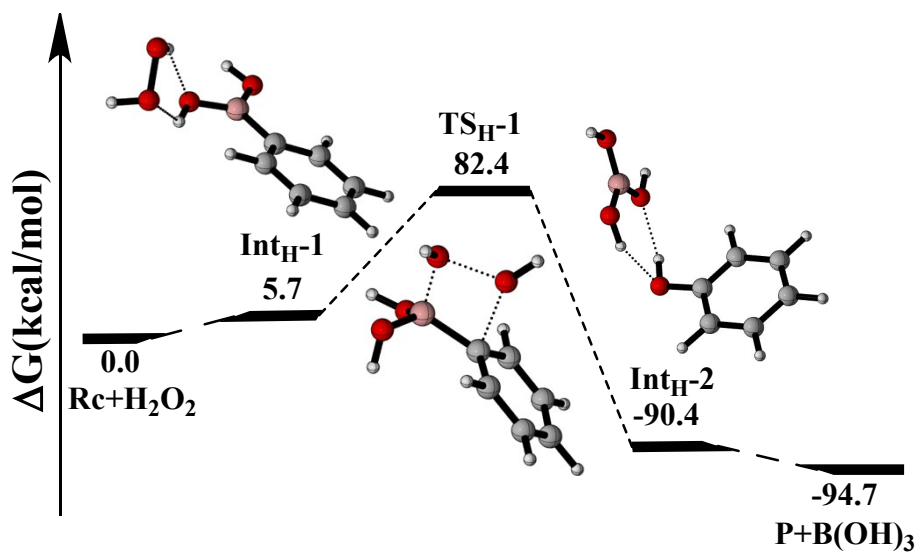

Fig. S1 Computed free energy profiles of the oxidative pathway with  $\text{H}_2\text{O}_2$ .

## 2. NMR data

### 2-methylphenol (Table 2, 2a)

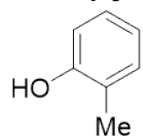

Yellow liquid (94.08 mg 87% yield) <sup>1</sup>H NMR (400 MHz, Chloroform-*d*)  
δ (ppm) 7.15–7.03 (m, 2H), 6.84 (t, *J* = 7.4 Hz, 1H), 6.75 (d, *J* = 8.0 Hz, 1H), 4.62 (s, 1H), 2.24 (s, 3H).

### 3-methylphenol (Table 2, 2b)

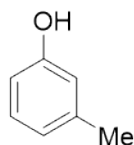

Yellow liquid (88.67 mg 82% yield) <sup>1</sup>H NMR (400 MHz, Chloroform-*d*)  
δ (ppm) 7.11 (t, *J* = 7.7 Hz, 1H), 6.74 (d, *J* = 7.5 Hz, 1H), 6.64 (d, *J* = 8.3 Hz, 2H), 5.04 (s, 1H), 2.28 (s, 3H).

### 4-methylphenol (Table 2, 2c)

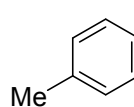

Yellow liquid (88.67 mg 82% yield) <sup>1</sup>H NMR (400 MHz, Chloroform-*d*)  
δ (ppm) 7.03 (d, *J* = 8.4 Hz, 2H), 6.73 (d, *J* = 8.4 Hz, 2H), 4.72 (s, 1H), 2.27 (s, 3H).

### 2-methoxyphenol (Table 2, 2d)

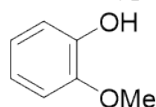

Yellow liquid (100.55 mg 81% yield) <sup>1</sup>H NMR (400 MHz, Chloroform-*d*)  
δ (ppm) 6.96–6.80 (m, 4H), 5.46 (s, 1H), 3.86 (s, 3H).

### 3-methoxyphenol (Table 2, 2e)

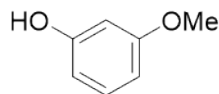

Yellow liquid (101.77 mg 82% yield) <sup>1</sup>H NMR (400 MHz, Chloroform-*d*)  
δ (ppm) 7.12 (t, *J* = 8.1 Hz, 1H), 6.49 (dd, *J* = 8.6, 1.7 Hz, 1H), 6.47–6.37 (m, 2H), 5.24 (s, 1H), 3.75 (s, 3H).

### 4-methoxyphenol (Table 2, 2f)

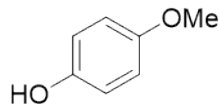

White solid (106.76 mg 86% yield) <sup>1</sup>H NMR (400 MHz, Chloroform-*d*)  
δ (ppm) 6.77 (m, *J* = 7.8, 4.6 Hz, 4H), 4.71 (s, 1H), 3.76 (s, 3H).

### 3-nitrophenol (Table 2, 2g)

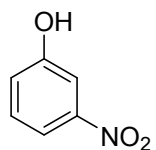

Pale yellow solid (123.80 mg 89% yield) <sup>1</sup>H NMR (400 MHz, DMSO-*d*)  
δ (ppm) 10.45 (s, 1H), 7.67 (d, *J* = 8.1 Hz, 1H), 7.56 (t, *J* = 2.2 Hz, 1H), 7.47 (t, *J* = 8.2 Hz, 1H), 7.23 (dd, *J* = 8.2, 2.3 Hz, 1H).

### 4-fluorophenol (Table 2, 2h)

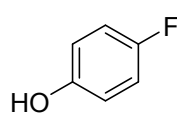

Yellow solid (89.66 mg 80% yield) <sup>1</sup>H NMR (400 MHz, Chloroform-*d*)  
δ (ppm) 6.92 (t, *J* = 8.6 Hz, 2H), 6.81–6.73 (m, 2H), 4.80 (s, 1H).  
<sup>13</sup>C NMR (101 MHz, Chloroform-*d*) δ (ppm) 158.59, 156.22, 151.12, 116.41.

### 4-chlorophenol (Table 2, 2i)

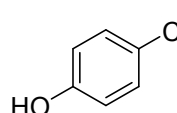

White solid (102.83 mg 80% yield) <sup>1</sup>H NMR (400 MHz, Chloroform-*d*)  
δ (ppm) 7.18 (d, *J* = 8.7 Hz, 2H), 6.76 (d, *J* = 8.7 Hz, 2H), 4.89 (s, 1H).  
<sup>13</sup>C NMR (101 MHz, Chloroform-*d*) δ (ppm) 153.91, 129.61, 125.75, 116.76.

### 4-bromophenol (Table 2, 2j)

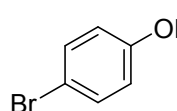

White solid (143.55 mg 83% yield) <sup>1</sup>H NMR (400 MHz, Chloroform-*d*)  
δ (ppm) 7.32 (d, *J* = 8.7 Hz, 2H), 6.71 (d, *J* = 8.7 Hz, 2H), 4.95 (s, 1H).  
<sup>13</sup>C NMR (101 MHz, Chloroform-*d*) δ (ppm) 154.32, 132.61, 117.34, 113.13.

**4-cyanophenol (Table 2, 2k)**

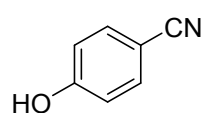

Grey white solid (95.30 mg 80% yield) <sup>1</sup>H NMR (400 MHz, Chloroform-*d*)  
δ (ppm) 7.57–7.55 (d, *J* = 8.7 Hz, 2H), 6.93–6.91 (d, *J* = 8.4 Hz, 2H), 5.65 (s, 1H).

**4-tert-butylphenol (Table 2, 2l)**

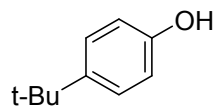

White solid (120.18 mg 80% yield) <sup>1</sup>H NMR (400 MHz, Chloroform-*d*)  
δ (ppm) 7.29–7.23 (m, 2H), 6.76 (dd, *J* = 8.8, 2.8 Hz, 2H), 4.55 (s, 1H), 1.29 (d, *J* = 2.4 Hz, 9H).

**4-isopropylphenol (Table 3, 2m)**

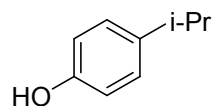

White solid (119.88 mg 88% yield) <sup>1</sup>H NMR (400 MHz, Chloroform-*d*)  
δ (ppm) 7.09 (d, *J* = 8.4 Hz, 2H), 6.76 (d, *J* = 8.5 Hz, 2H), 4.56 (s, 1H), 2.85 (p, *J* = 6.9 Hz, 1H), 1.21 (d, *J* = 6.9 Hz, 6H).

### 3. NMR Spectra of synthesized products

#### 2-methylphenol (2a)

<sup>1</sup>H NMR

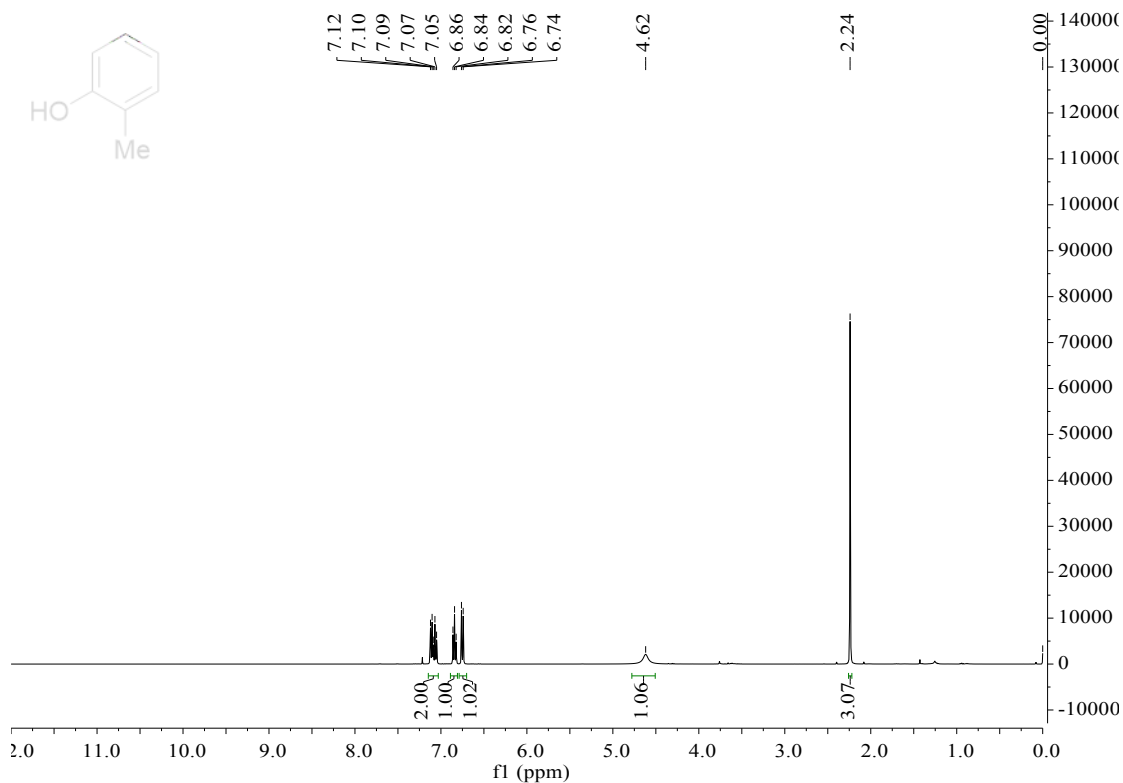

#### 3-methylphenol (2b)

<sup>1</sup>H NMR

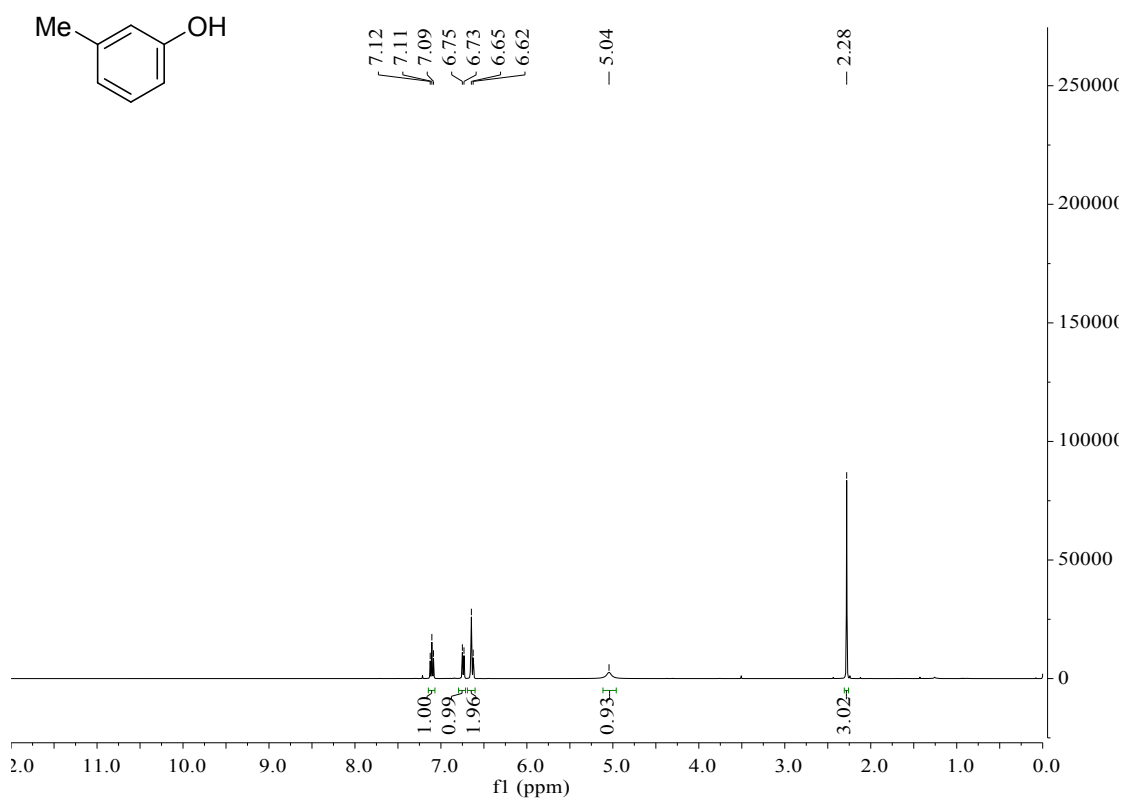

### 4-methylphenol (2c)

<sup>1</sup>H NMR

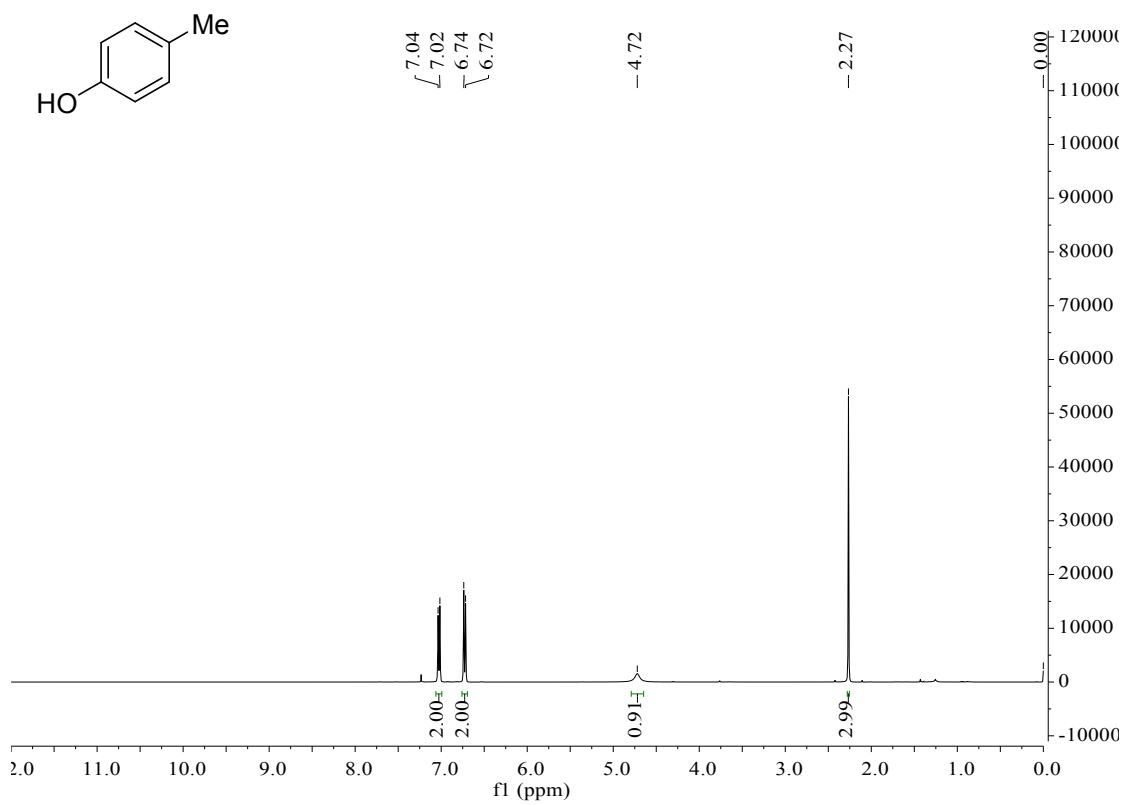

### 2-methoxyphenol (2d)

<sup>1</sup>H NMR

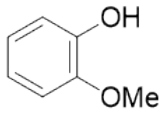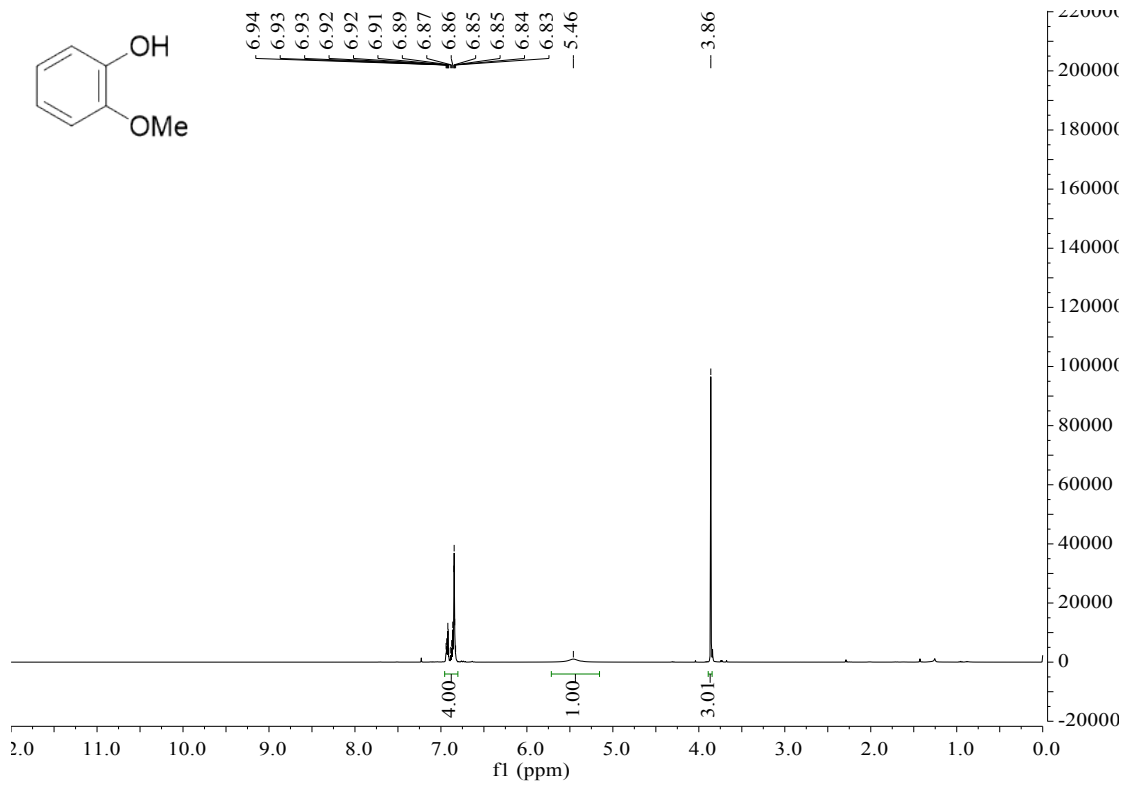

### 3-methoxyphenol (2e)

<sup>1</sup>H NMR

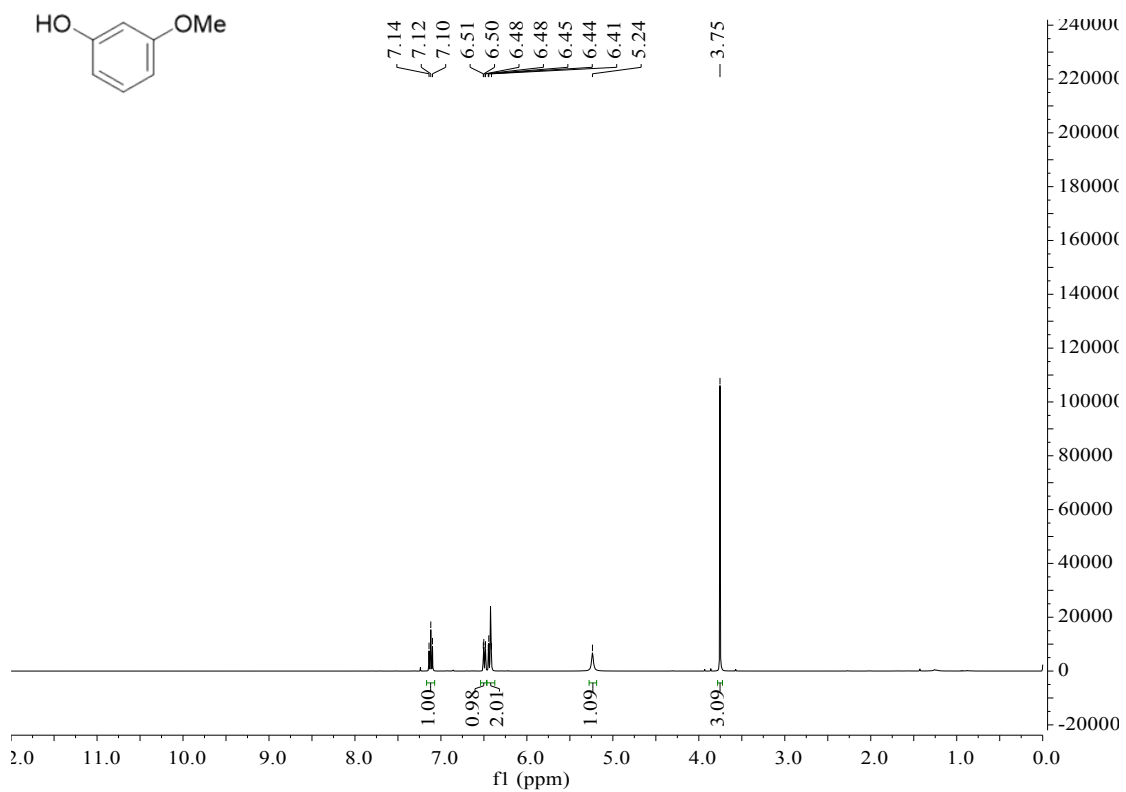

### 4-methoxyphenol (2f)

<sup>1</sup>H NMR

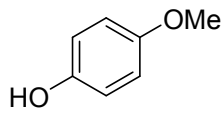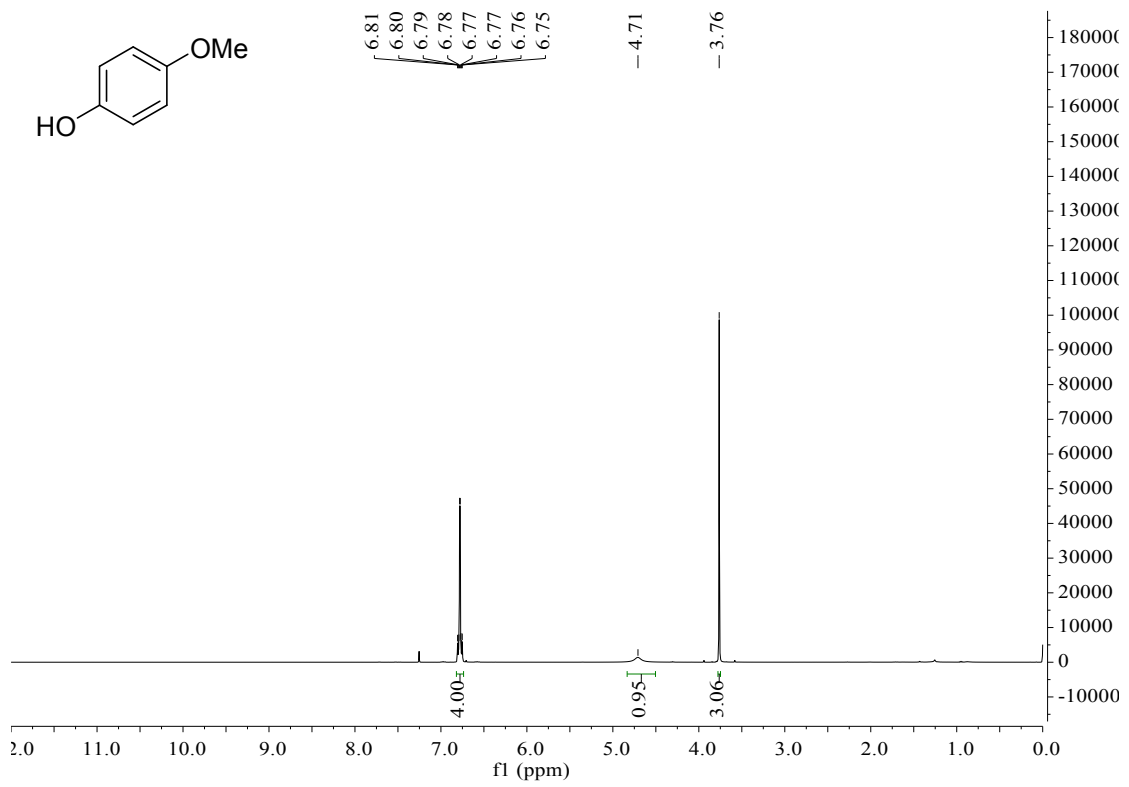



3-nitrophenol (2g)

<sup>1</sup>H NMR

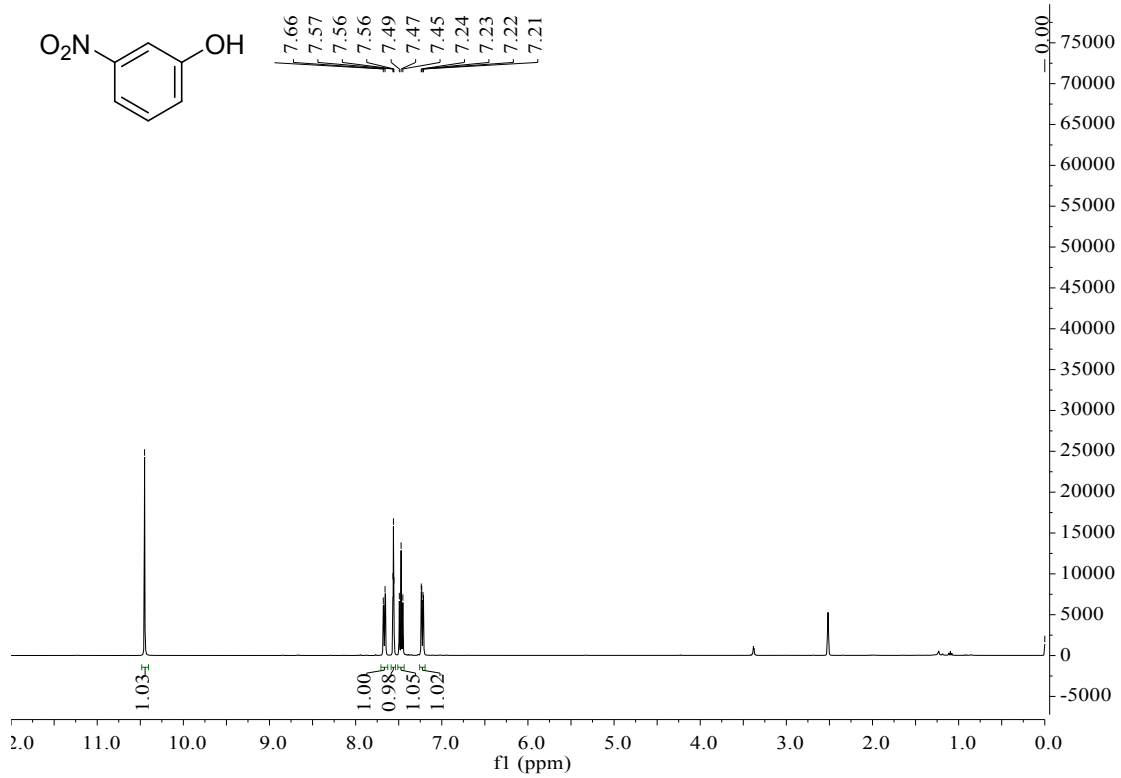

### 4-fluorophenol (2h)

#### $^1\text{H}$ NMR

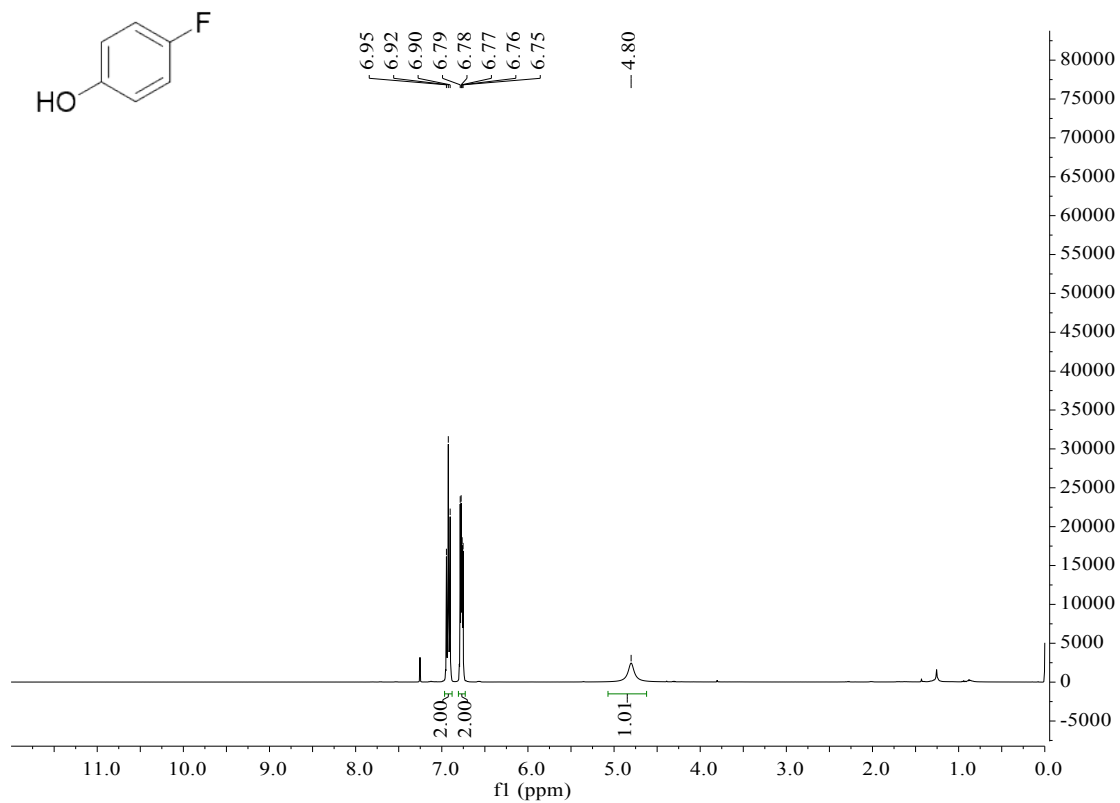

#### $^{13}\text{C}$ NMR

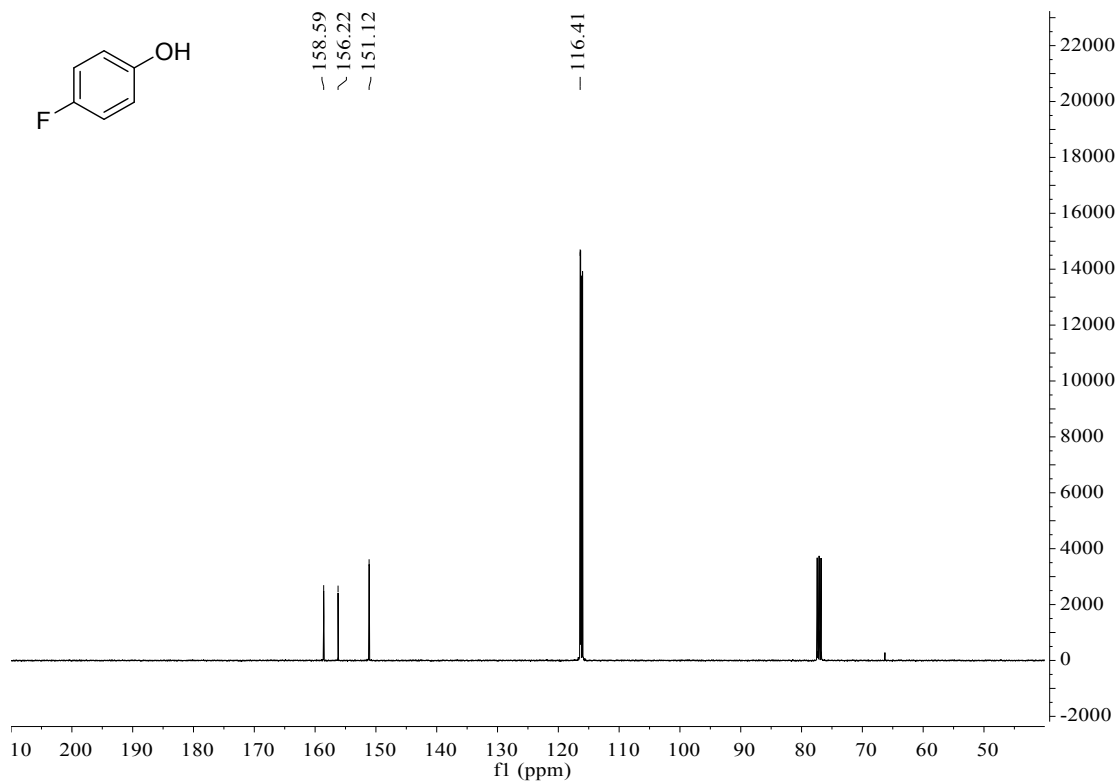

### 4-chlorophenol (2i)

#### $^1\text{H}$ NMR

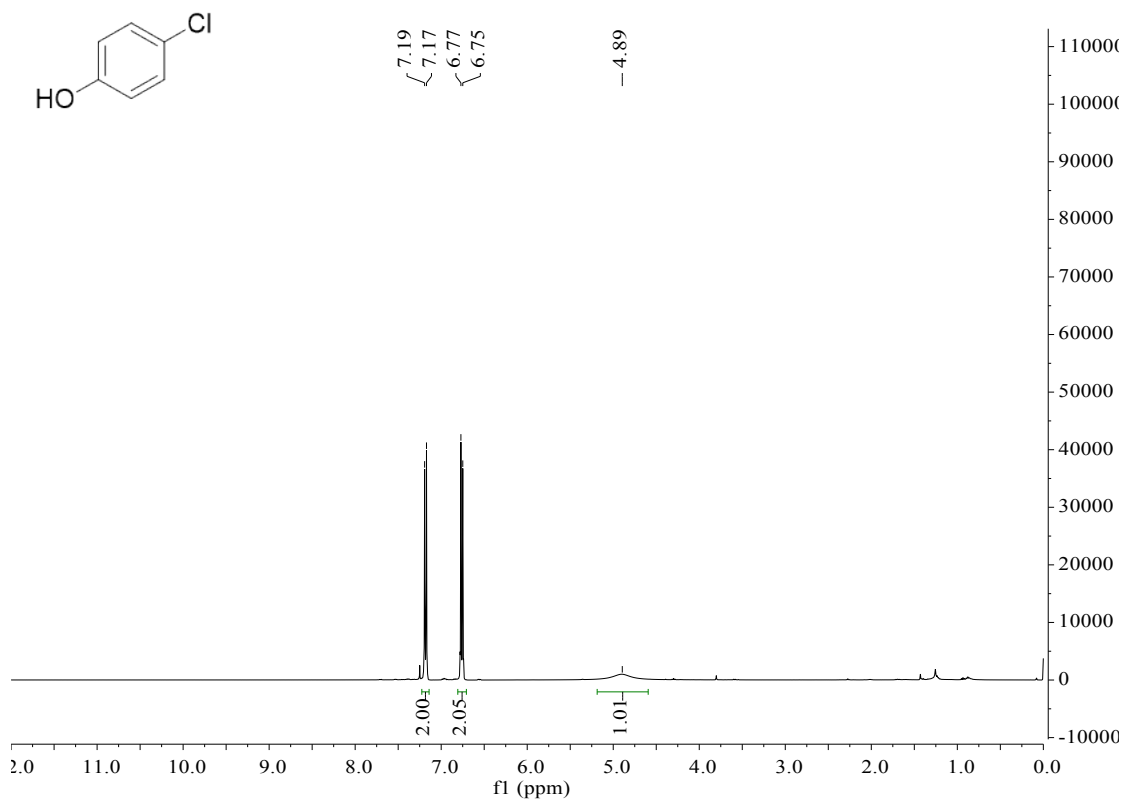

#### $^{13}\text{C}$ NMR

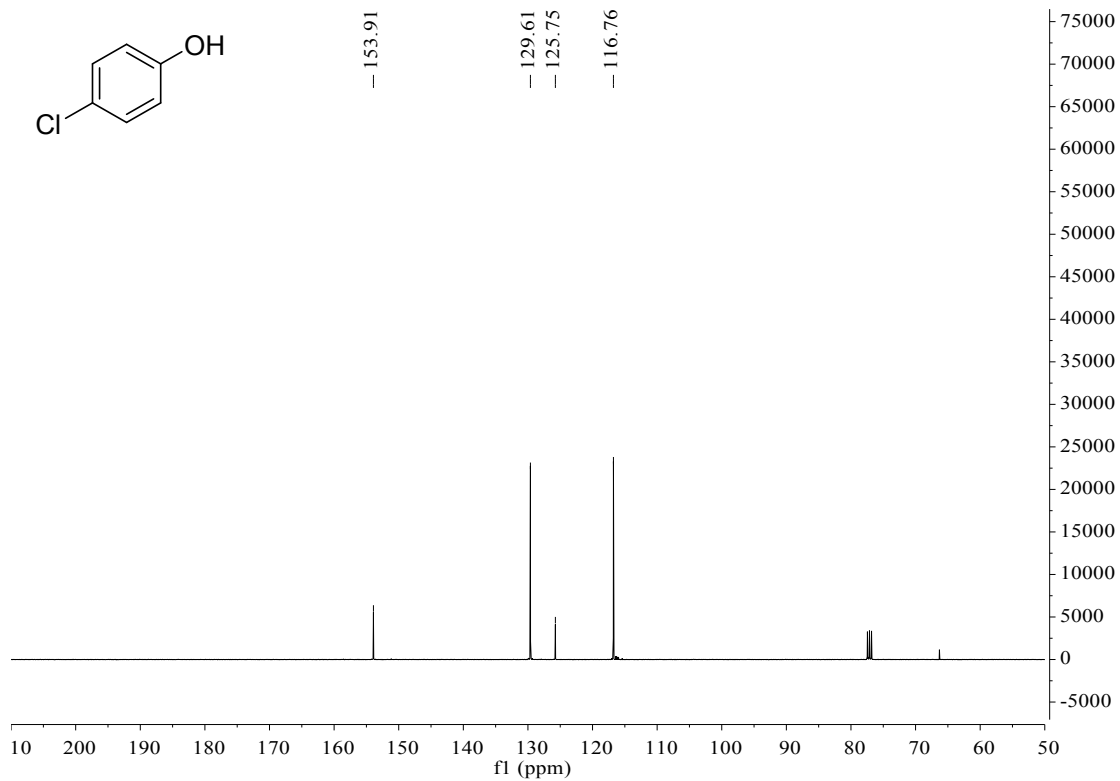

### 4-bromophenol (2j)

#### $^1\text{H}$ NMR

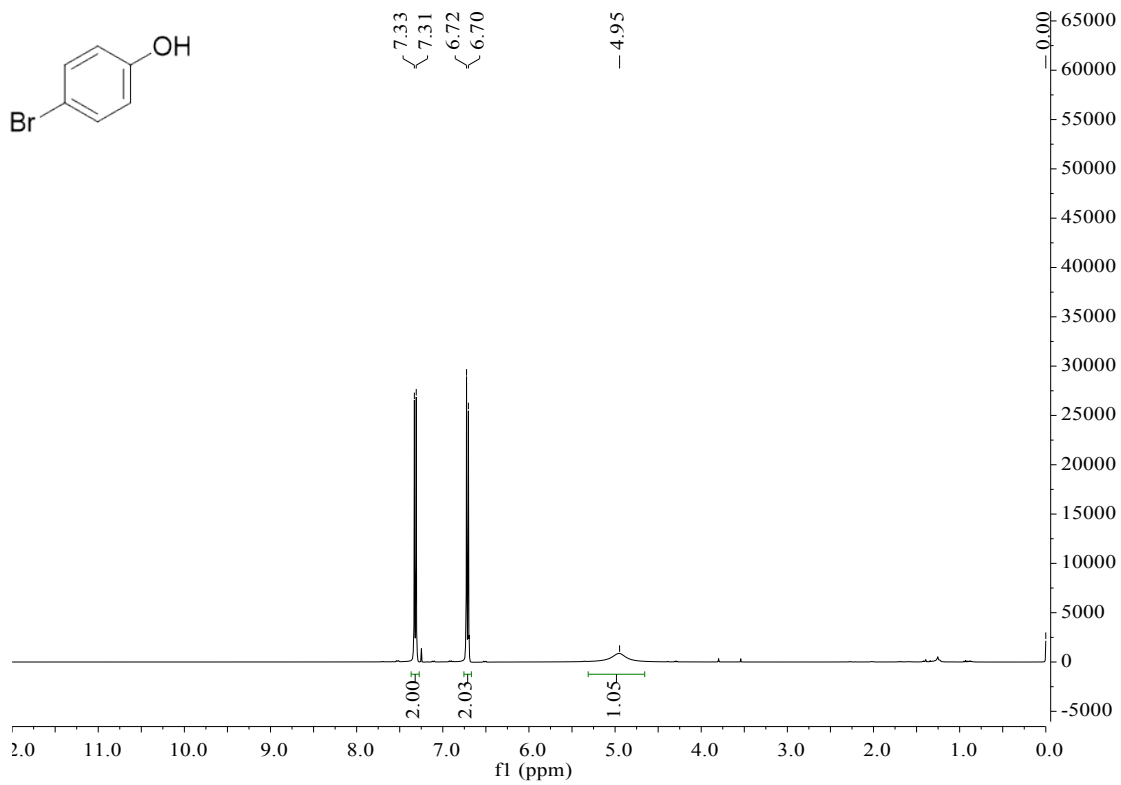

#### $^{13}\text{C}$ NMR

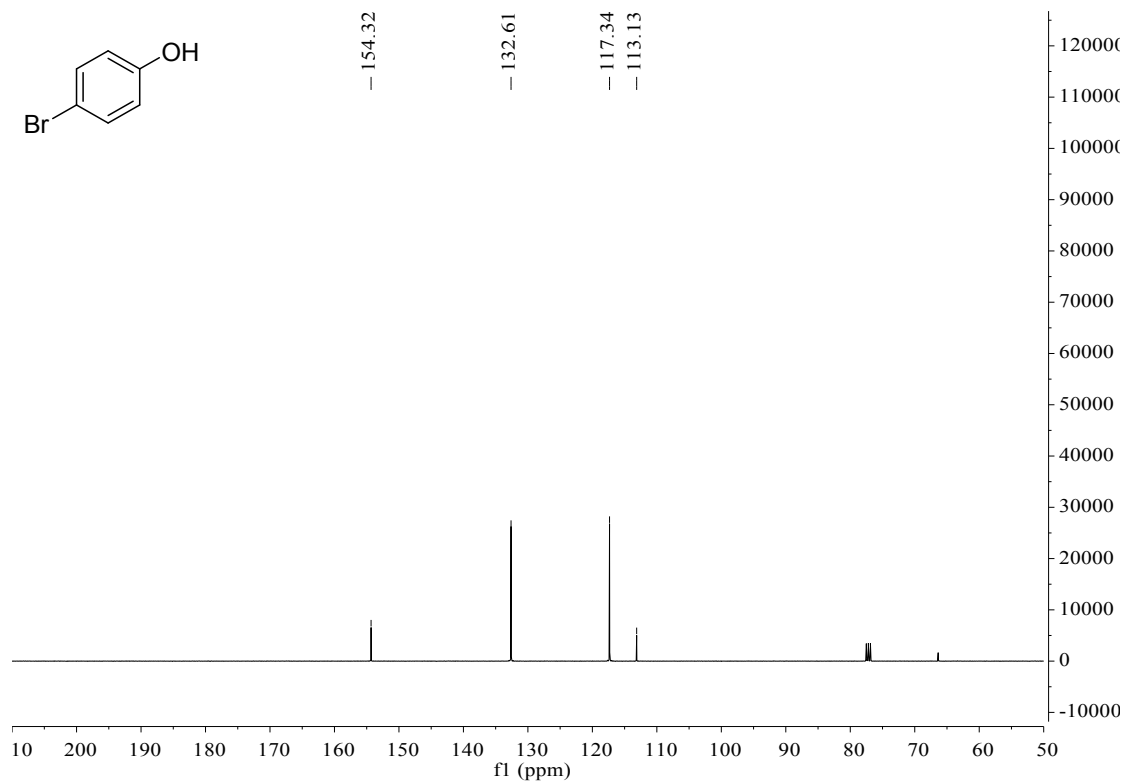

### 4-cyanophenol (2k)

#### <sup>1</sup>H NMR

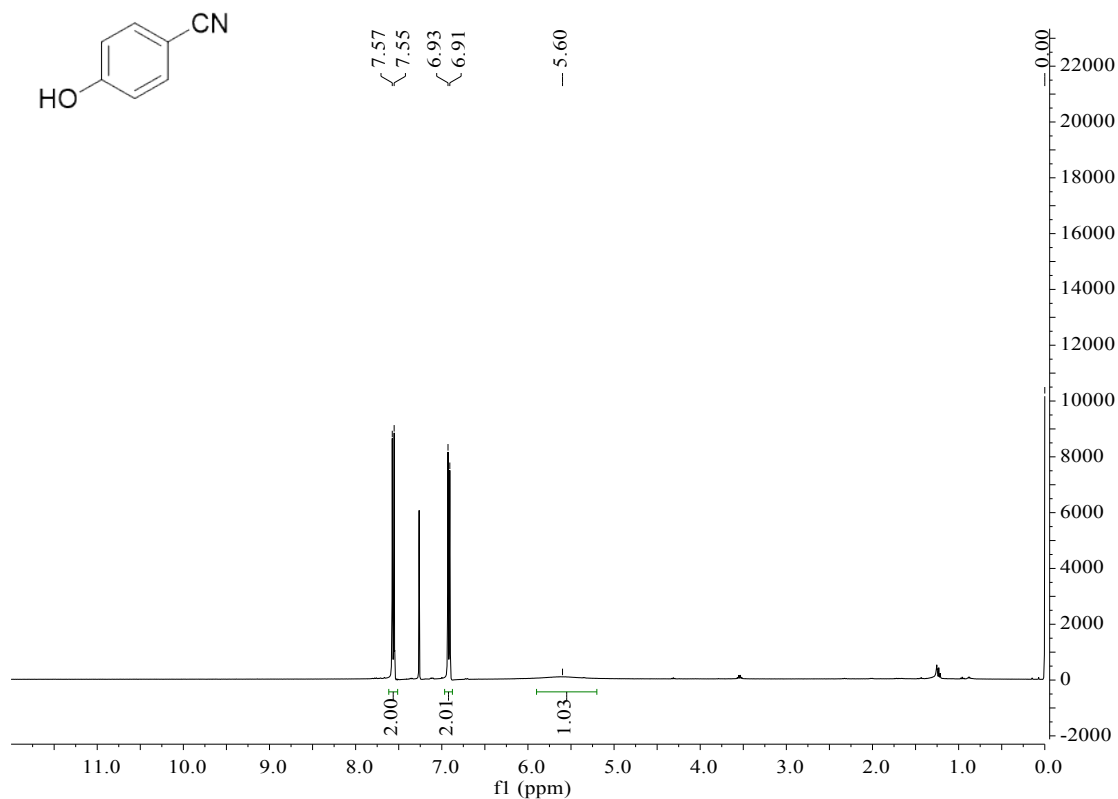

### 4-tert-butylphenol (2l)

#### <sup>1</sup>H NMR

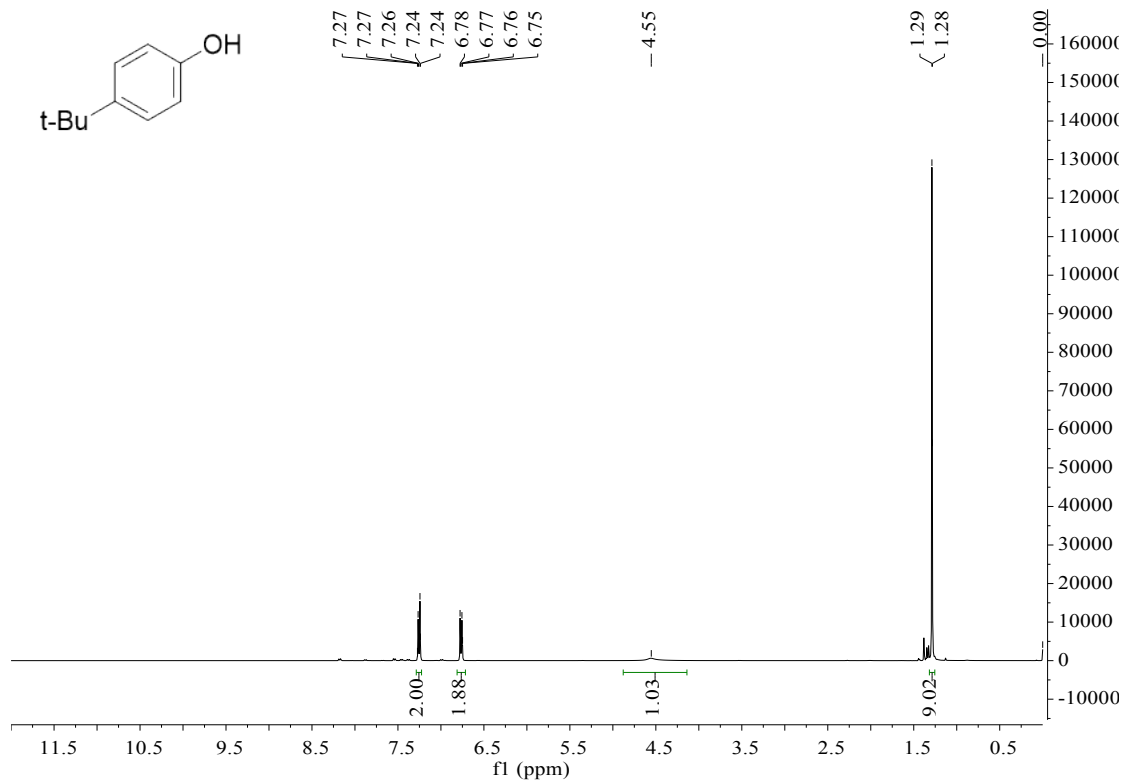

# 4-isopropylphenol (2m)

## <sup>1</sup>H NMR

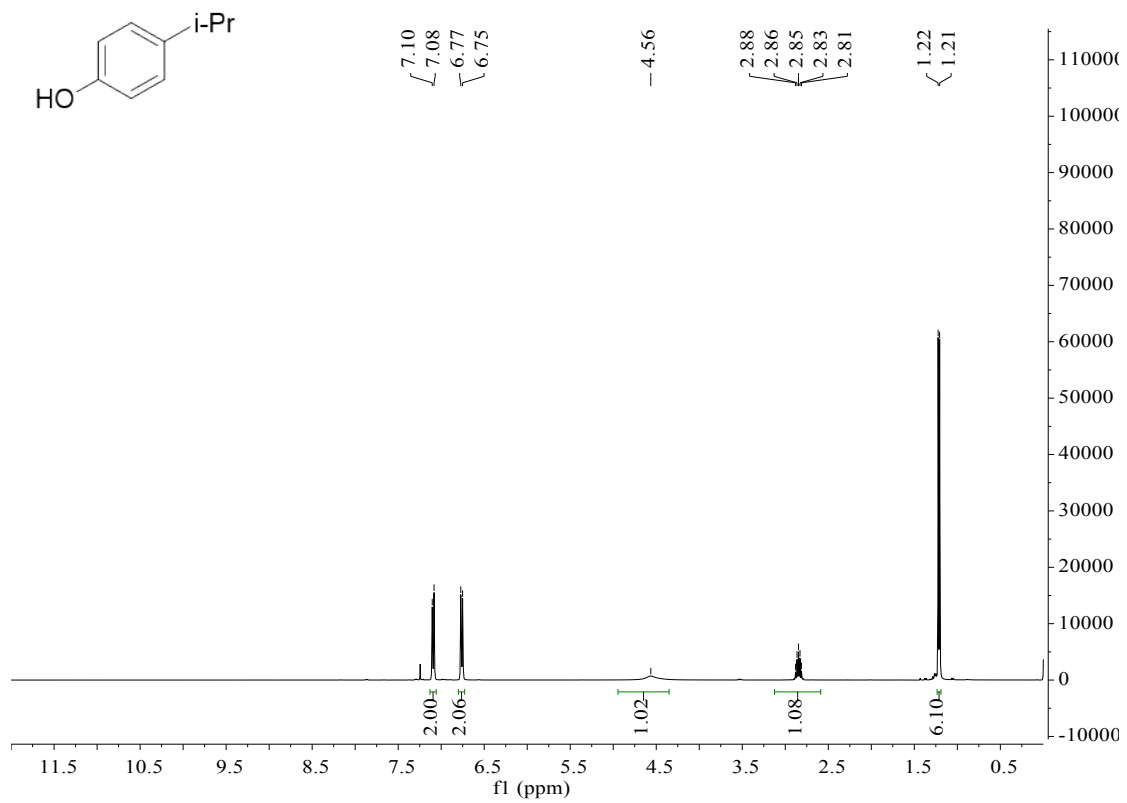

#### 4. Optimized structure informations:

Int-1.log

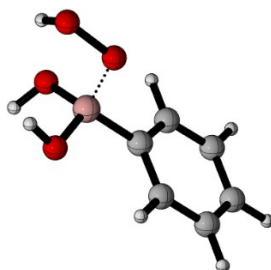

Sum of electronic and zero-point Energies = -559.208813

Sum of electronic and thermal Energies = -559.198213

Sum of electronic and thermal Enthalpies = -559.197268

Sum of electronic and thermal Free Energies = -559.245192

|   |             |             |             |
|---|-------------|-------------|-------------|
| C | 3.24958400  | -0.14517800 | -0.17543000 |
| C | 2.47318600  | -1.28483900 | 0.01078800  |
| C | 1.09426400  | -1.17001200 | 0.15037000  |
| C | 0.44532200  | 0.06929000  | 0.10435600  |
| C | 1.24958600  | 1.19663000  | -0.08460600 |
| C | 2.63251300  | 1.09936200  | -0.22047200 |
| H | 4.32494100  | -0.22738100 | -0.28187900 |
| H | 2.94577500  | -2.25994000 | 0.05036000  |
| H | 0.50254300  | -2.06734900 | 0.30445100  |
| H | 0.77873900  | 2.17323300  | -0.12184400 |
| H | 3.22915300  | 1.99363800  | -0.36230200 |
| B | -1.16870300 | 0.16524400  | 0.24319100  |
| O | -1.73418800 | -0.75513900 | 1.26438900  |
| H | -1.85865100 | -0.27577900 | 2.08643800  |
| O | -1.57361800 | 1.54622800  | 0.50175000  |
| H | -2.52181200 | 1.61215300  | 0.35033500  |
| H | -3.23254900 | -0.83306500 | -0.08346400 |
| O | -3.13815800 | -0.38655700 | -0.94253200 |
| O | -1.70295600 | -0.34618800 | -1.05711600 |

## TS-1.log

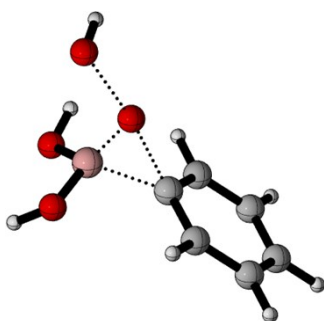

Sum of electronic and zero-point Energies = -559.162532

Sum of electronic and thermal Energies = -559.151462

Sum of electronic and thermal Enthalpies = -559.150518

Sum of electronic and thermal Free Energies = -559.199042

|   |             |             |             |
|---|-------------|-------------|-------------|
| C | -3.17418300 | -0.05030600 | 0.15103900  |
| C | -2.46293600 | -1.22961300 | -0.04645200 |
| C | -1.07365300 | -1.20162900 | -0.10342800 |
| C | -0.38612300 | 0.00239700  | 0.01447000  |
| C | -1.10212200 | 1.17583200  | 0.23331900  |
| C | -2.49103600 | 1.15372000  | 0.29334200  |
| H | -4.25610900 | -0.07000200 | 0.19824800  |
| H | -2.99087200 | -2.16992300 | -0.15365400 |
| H | -0.52728200 | -2.12757100 | -0.25067000 |
| H | -0.56620300 | 2.11251000  | 0.33784500  |
| H | -3.04132300 | 2.07384900  | 0.45184800  |
| B | 1.33512200  | 0.12864800  | -0.49704300 |
| O | 1.74670900  | -0.88136800 | -1.41226500 |
| H | 1.71309300  | -1.74722100 | -0.99810300 |
| O | 1.65365900  | 1.43296000  | -0.95861100 |
| H | 1.94915200  | 1.39641600  | -1.87184000 |
| H | 3.03636500  | -1.14656600 | 1.63661400  |
| O | 3.05483700  | -0.19678000 | 1.48376300  |
| O | 1.31328100  | -0.11320400 | 0.87226200  |



## Int-2.log

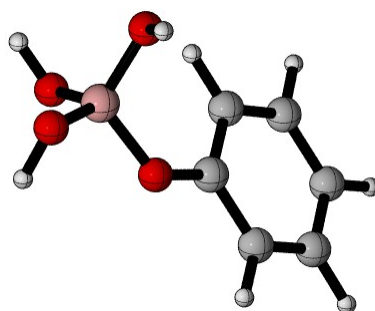

Sum of electronic and zero-point Energies = -559.349793

Sum of electronic and thermal Energies = -559.339230

Sum of electronic and thermal Enthalpies = -559.338286

Sum of electronic and thermal Free Energies = -559.385946

|   |             |             |             |
|---|-------------|-------------|-------------|
| C | 3.22724600  | -0.39202500 | -0.00371300 |
| C | 2.20389600  | -1.33325100 | -0.00646800 |
| C | 0.86812300  | -0.94994000 | -0.00884900 |
| C | 0.52518000  | 0.41110000  | -0.00863100 |
| C | 1.56370500  | 1.35519900  | -0.00655600 |
| C | 2.89190200  | 0.95890700  | -0.00368100 |
| H | 4.26391600  | -0.70394700 | -0.00135400 |
| H | 2.44592600  | -2.39033300 | -0.00637800 |
| H | 0.08083500  | -1.68887600 | -0.00853600 |
| H | 1.29949100  | 2.40642800  | -0.00713700 |
| H | 3.67200700  | 1.71163800  | -0.00125300 |
| B | -1.94640600 | -0.00890900 | 0.00748600  |
| O | -2.00407500 | -0.92589600 | -1.12448700 |
| H | -2.33248800 | -0.45359000 | -1.89354700 |
| O | -1.89265400 | -0.75981100 | 1.25790500  |
| H | -2.62301800 | -1.38327400 | 1.27452100  |
| H | -3.04327600 | 1.55011300  | 0.61664100  |
| O | -3.09094100 | 0.89925900  | -0.08818000 |
| O | -0.72628900 | 0.87350500  | -0.01811200 |

## TS-2.log

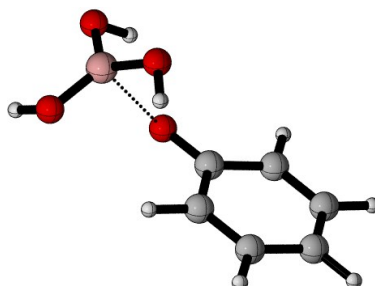

Sum of electronic and zero-point Energies = -559.308743

Sum of electronic and thermal Energies = -559.298243

Sum of electronic and thermal Enthalpies = -559.297299

Sum of electronic and thermal Free Energies = -559.346044

|   |             |             |             |
|---|-------------|-------------|-------------|
| C | 3.16790900  | -0.60778800 | 0.24644100  |
| C | 2.96621200  | 0.76951500  | 0.32060000  |
| C | 1.74681100  | 1.33798200  | -0.00821900 |
| C | 0.63897700  | 0.55239600  | -0.44160100 |
| C | 0.87896200  | -0.85319700 | -0.50790900 |
| C | 2.10422700  | -1.40526000 | -0.17439900 |
| H | 4.12343900  | -1.04527900 | 0.50533900  |
| H | 3.77897700  | 1.41255400  | 0.64461600  |
| H | 1.60459000  | 2.41203000  | 0.05649300  |
| H | 0.06089600  | -1.48488400 | -0.84119600 |
| H | 2.23684700  | -2.48085500 | -0.24325600 |
| B | -2.37110500 | -0.16904700 | 0.28064400  |
| O | -1.65219300 | -0.52363500 | 1.39365800  |
| H | -1.19933100 | -1.36209400 | 1.26290700  |
| O | -2.94711600 | 1.08237400  | 0.20305700  |
| H | -2.18950100 | 1.68311200  | 0.13299700  |
| H | -3.17695300 | -0.78739200 | -1.36413800 |
| O | -2.70542500 | -1.15838900 | -0.61320100 |
| O | -0.49551900 | 1.06666900  | -0.75432200 |

### Int-3.log

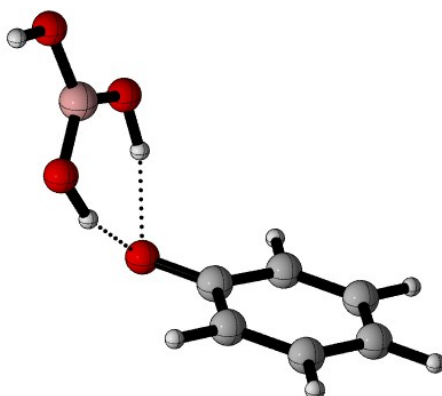

Sum of electronic and zero-point Energies = -559.350127

Sum of electronic and thermal Energies = -559.339520

Sum of electronic and thermal Enthalpies = -559.338576

Sum of electronic and thermal Free Energies = -559.388868

|   |             |             |             |
|---|-------------|-------------|-------------|
| C | 3.35340100  | 0.21682400  | -0.76412000 |
| C | 2.60839800  | 1.31862400  | -0.35042000 |
| C | 1.41675100  | 1.15748100  | 0.34100600  |
| C | 0.91164800  | -0.12702000 | 0.65096200  |
| C | 1.68393600  | -1.23157000 | 0.22108900  |
| C | 2.87445700  | -1.05747800 | -0.46858400 |
| H | 4.28392100  | 0.34790500  | -1.30106400 |
| H | 2.96272000  | 2.32022800  | -0.56960700 |
| H | 0.84597500  | 2.02349300  | 0.65993400  |
| H | 1.31847900  | -2.22796700 | 0.44604900  |
| H | 3.43849600  | -1.93013200 | -0.78054800 |
| B | -2.78456400 | -0.00598600 | -0.22722500 |
| O | -3.95331100 | 0.13051200  | -0.94115700 |
| H | -4.27385600 | 1.03681200  | -0.91918300 |
| O | -2.22747300 | -1.25427300 | -0.17908100 |
| H | -1.40526700 | -1.19232900 | 0.36093800  |
| H | -1.38277000 | 0.74667900  | 0.84437100  |
| O | -2.22330000 | 1.06706500  | 0.39860900  |
| O | -0.21546900 | -0.28779500 | 1.29858300  |

## Int-4.log

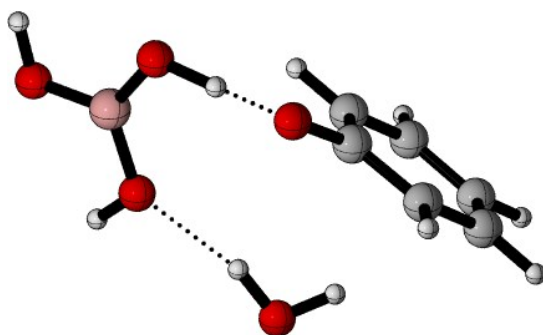

Sum of electronic and zero-point Energies = -635.764159

Sum of electronic and thermal Energies = -635.750534

Sum of electronic and thermal Enthalpies = -635.749590

Sum of electronic and thermal Free Energies = -635.805351

|   |             |             |             |
|---|-------------|-------------|-------------|
| C | -3.01640200 | -0.50012000 | 0.94003400  |
| C | -1.79601200 | -0.33845500 | 1.59265700  |
| C | -0.76641600 | 0.39176200  | 1.01925600  |
| C | -0.91236700 | 0.99800300  | -0.25340600 |
| C | -2.16796800 | 0.84291800  | -0.88746000 |
| C | -3.18873200 | 0.10757800  | -0.30323900 |
| H | -3.81370500 | -1.07744600 | 1.38952500  |
| H | -1.64190900 | -0.79763600 | 2.56337900  |
| H | 0.18214000  | 0.49527100  | 1.53395400  |
| H | -2.30658900 | 1.29829800  | -1.86187000 |
| H | -4.13181200 | 0.00003000  | -0.82813300 |
| B | 2.74593200  | -0.02311200 | 0.06575700  |
| O | 2.29106600  | 1.23066200  | 0.08474700  |
| H | 1.30291600  | 1.39359500  | -0.30479000 |
| O | 3.99292000  | -0.36429600 | 0.55658300  |
| H | 4.45449400  | 0.40725600  | 0.89771900  |
| H | 2.47633000  | -1.90612900 | -0.39212200 |
| O | 1.99697800  | -1.07278000 | -0.45011700 |
| O | 0.05817400  | 1.65502700  | -0.83008600 |
| O | -0.59154100 | -2.13266000 | -1.14616100 |
| H | -1.33448700 | -1.60901800 | -0.82061100 |
| H | 0.18956400  | -1.62639900 | -0.87261100 |

### TS-3.log

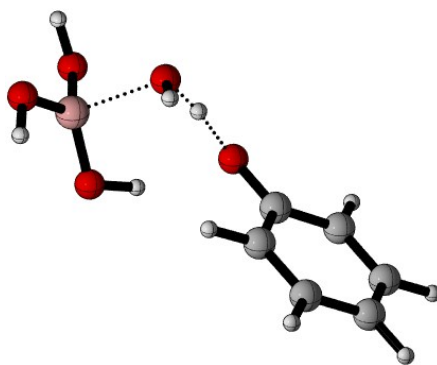

Sum of electronic and zero-point Energies = -635.750103

Sum of electronic and thermal Energies = -635.737690

Sum of electronic and thermal Enthalpies = -635.736745

Sum of electronic and thermal Free Energies = -635.789908

|   |             |             |             |
|---|-------------|-------------|-------------|
| C | -3.01640200 | -0.50012000 | 0.94003400  |
| C | -1.79601200 | -0.33845500 | 1.59265700  |
| C | -0.76641600 | 0.39176200  | 1.01925600  |
| C | -0.91236700 | 0.99800300  | -0.25340600 |
| C | -2.16796800 | 0.84291800  | -0.88746000 |
| C | -3.18873200 | 0.10757800  | -0.30323900 |
| H | -3.81370500 | -1.07744600 | 1.38952500  |
| H | -1.64190900 | -0.79763600 | 2.56337900  |
| H | 0.18214000  | 0.49527100  | 1.53395400  |
| H | -2.30658900 | 1.29829800  | -1.86187000 |
| H | -4.13181200 | 0.00003000  | -0.82813300 |
| B | 2.74593200  | -0.02311200 | 0.06575700  |
| O | 2.29106600  | 1.23066200  | 0.08474700  |
| H | 1.30291600  | 1.39359500  | -0.30479000 |
| O | 3.99292000  | -0.36429600 | 0.55658300  |
| H | 4.45449400  | 0.40725600  | 0.89771900  |
| H | 2.47633000  | -1.90612900 | -0.39212200 |
| O | 1.99697800  | -1.07278000 | -0.45011700 |
| O | 0.05817400  | 1.65502700  | -0.83008600 |
| O | -0.59154100 | -2.13266000 | -1.14616100 |
| H | -1.33448700 | -1.60901800 | -0.82061100 |
| H | 0.18956400  | -1.62639900 | -0.87261100 |

## Int-5.log

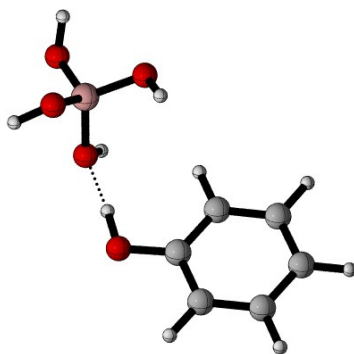

Sum of electronic and zero-point Energies = -635.764832

Sum of electronic and thermal Energies = -635.751747

Sum of electronic and thermal Enthalpies = -635.750803

Sum of electronic and thermal Free Energies = -635.805770

|   |             |             |             |
|---|-------------|-------------|-------------|
| C | -3.01640200 | -0.50012000 | 0.94003400  |
| C | -1.79601200 | -0.33845500 | 1.59265700  |
| C | -0.76641600 | 0.39176200  | 1.01925600  |
| C | -0.91236700 | 0.99800300  | -0.25340600 |
| C | -2.16796800 | 0.84291800  | -0.88746000 |
| C | -3.18873200 | 0.10757800  | -0.30323900 |
| H | -3.81370500 | -1.07744600 | 1.38952500  |
| H | -1.64190900 | -0.79763600 | 2.56337900  |
| H | 0.18214000  | 0.49527100  | 1.53395400  |
| H | -2.30658900 | 1.29829800  | -1.86187000 |
| H | -4.13181200 | 0.00003000  | -0.82813300 |
| B | 2.74593200  | -0.02311200 | 0.06575700  |
| O | 2.29106600  | 1.23066200  | 0.08474700  |
| H | 1.30291600  | 1.39359500  | -0.30479000 |
| O | 3.99292000  | -0.36429600 | 0.55658300  |
| H | 4.45449400  | 0.40725600  | 0.89771900  |
| H | 2.47633000  | -1.90612900 | -0.39212200 |
| O | 1.99697800  | -1.07278000 | -0.45011700 |
| O | 0.05817400  | 1.65502700  | -0.83008600 |
| O | -0.59154100 | -2.13266000 | -1.14616100 |
| H | -1.33448700 | -1.60901800 | -0.82061100 |
| H | 0.18956400  | -1.62639900 | -0.87261100 |

## Int<sub>H</sub>-1.log

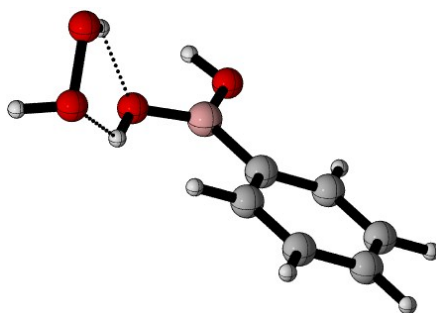

Sum of electronic and zero-point Energies = -559.647785

Sum of electronic and thermal Energies = -559.635874

Sum of electronic and thermal Enthalpies = -559.634930

Sum of electronic and thermal Free Energies = -559.687391

|   |             |             |             |
|---|-------------|-------------|-------------|
| C | 3.01059900  | -1.27137400 | 0.09720400  |
| C | 3.16213500  | 0.10740800  | 0.19524500  |
| C | 2.04904700  | 0.93283700  | 0.11003600  |
| C | 0.76902900  | 0.40284700  | -0.08321600 |
| C | 0.63777200  | -0.98627200 | -0.17650300 |
| C | 1.74609900  | -1.81901400 | -0.08576900 |
| H | 3.87657600  | -1.91872600 | 0.16360700  |
| H | 4.14659500  | 0.53581500  | 0.33860000  |
| H | 2.16953500  | 2.00724400  | 0.19003900  |
| H | -0.34109100 | -1.43751900 | -0.31024800 |
| H | 1.62471700  | -2.89291100 | -0.15624800 |
| B | -0.46703100 | 1.35876200  | -0.18198800 |
| O | -0.30786400 | 2.66759400  | 0.15860800  |
| H | -1.11477100 | 3.18225600  | 0.04401000  |
| O | -1.70603200 | 0.94500100  | -0.59216500 |
| H | -1.74996500 | 0.02451300  | -0.88566800 |
| O | -2.96130400 | -1.50078100 | -0.24060600 |
| H | -3.72965700 | -1.59030600 | -0.82228400 |
| H | -3.12159900 | 0.14067200  | 0.65591600  |
| O | -3.48395900 | -0.74224300 | 0.84294100  |

## TS<sub>H</sub>-1.log

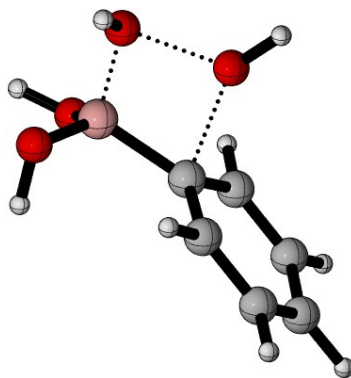

Sum of electronic and zero-point Energies = -559.528297

Sum of electronic and thermal Energies = -559.517019

Sum of electronic and thermal Enthalpies = -559.516075

Sum of electronic and thermal Free Energies = -559.565093

|   |             |             |             |
|---|-------------|-------------|-------------|
| C | 2.96337300  | 0.03306400  | -0.20461200 |
| C | 2.28423000  | 1.20398700  | 0.14774900  |
| C | 0.91156700  | 1.19124500  | 0.27496300  |
| C | 0.16120800  | 0.02150700  | -0.00941200 |
| C | 0.88519400  | -1.16404300 | -0.28839400 |
| C | 2.26373200  | -1.15087400 | -0.41555300 |
| H | 4.04299900  | 0.04390800  | -0.29176600 |
| H | 2.84003300  | 2.11553200  | 0.32845100  |
| H | 0.37872900  | 2.09421500  | 0.54736400  |
| H | 0.33152400  | -2.08374400 | -0.43886000 |
| H | 2.79737800  | -2.06004600 | -0.66166800 |
| B | -1.47500800 | 0.14197900  | -0.38539800 |
| O | -1.70741400 | 1.48059600  | -0.83685400 |
| H | -2.60296100 | 1.56555500  | -1.17906200 |
| O | -1.93740000 | -0.93064000 | -1.23244400 |
| H | -1.42157600 | -0.98806000 | -2.04136900 |
| O | -0.67471200 | -0.52999200 | 1.77810100  |
| H | -0.52918600 | -0.79529200 | 2.72214700  |
| H | -2.61465700 | -0.97803200 | 0.91422900  |
| O | -2.26335600 | -0.07412000 | 0.91608300  |



## Int<sub>H</sub>-2.log

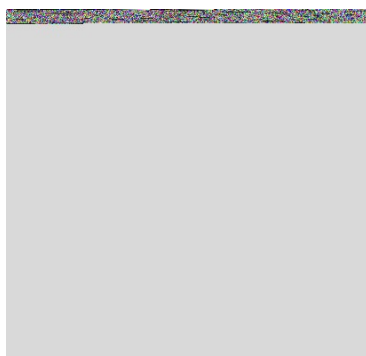

Sum of electronic and zero-point Energies = -559.800449

Sum of electronic and thermal Energies = -559.789080

Sum of electronic and thermal Enthalpies = -559.788136

Sum of electronic and thermal Free Energies = -559.840573

|   |             |             |             |
|---|-------------|-------------|-------------|
| C | 3.21124500  | 0.80032200  | 0.62482500  |
| C | 3.11265300  | -0.58704600 | 0.64830200  |
| C | 2.02545200  | -1.22756300 | 0.07160400  |
| C | 1.02899800  | -0.47206500 | -0.53623800 |
| C | 1.11483700  | 0.91599800  | -0.56620200 |
| C | 2.20852500  | 1.54474000  | 0.01635600  |
| H | 4.06083400  | 1.29492400  | 1.07709900  |
| H | 3.88815700  | -1.17760500 | 1.12033000  |
| H | 1.93557300  | -2.30663000 | 0.08372800  |
| H | 0.32993900  | 1.49275900  | -1.04174700 |
| H | 2.27317900  | 2.62553700  | -0.00856100 |
| B | -2.74660900 | 0.05332600  | 0.24055300  |
| O | -3.82330900 | 0.69620100  | 0.77291100  |
| H | -4.07740200 | 0.35034800  | 1.63445500  |
| O | -2.27222100 | 0.44680700  | -0.98886900 |
| H | -2.76324900 | 1.17778600  | -1.37812400 |
| O | -0.02567700 | -1.14365200 | -1.09016300 |
| H | -0.67115800 | -0.50572400 | -1.43902200 |
| H | -1.38454100 | -1.33094500 | 0.41671100  |
| O | -2.13736200 | -0.96603100 | 0.90368300  |
